# Supplementary material for: Mn3O4 hollow spheres for lithium-ion batteries with high rate and capacity
Source: Royal Society of Chemistry journal article supplement (doi:10.1039/c4ta00207e), 2014-01-01
Supplement: c4ta00207e1.pdf [file c4ta00207e1.pdf]

## Supporting Information

### Mn<sub>3</sub>O<sub>4</sub> Hollow Spheres for Lithium-ion Batteries with High Rate and Capacity

Guoqiang Jian,<sup>‡a</sup> Yunhua Xu,<sup>‡b</sup> Li-Chung Lai,<sup>c</sup> Chunsheng Wang<sup>\*b</sup> and Michael R. Zachariah<sup>\*ab</sup>

<sup>a</sup> Department of Chemistry and Biochemistry, University of Maryland, College Park, MD 20742, USA. E-mail: mrz@umd.edu

<sup>b</sup> Department of Chemical and Biomolecular Engineering, University of Maryland, College Park, MD 20742, USA. E-mail: cswang@umd.edu

<sup>c</sup> NISP Laboratory, Nanocenter, University of Maryland, College Park, MD 20742, USA

<sup>‡</sup>These authors contributed equally to this work.

**S1.** Enlarged image of inset SAED image shown in Figure 2a.

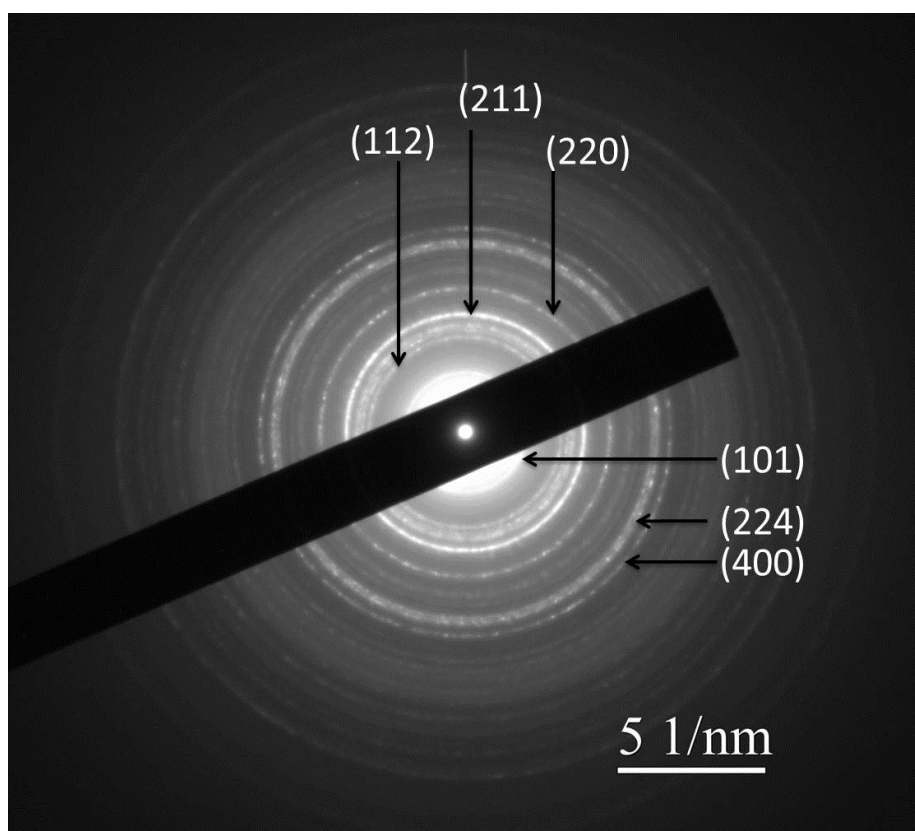

**Figure S1.** Enlarged SAED image of as collected hollow Mn<sub>3</sub>O<sub>4</sub> spheres. Note: The same as inset image shown in Figure 2a.

**S2.** SEM image of synthesized hollow  $\text{Mn}_3\text{O}_4$  spheres.

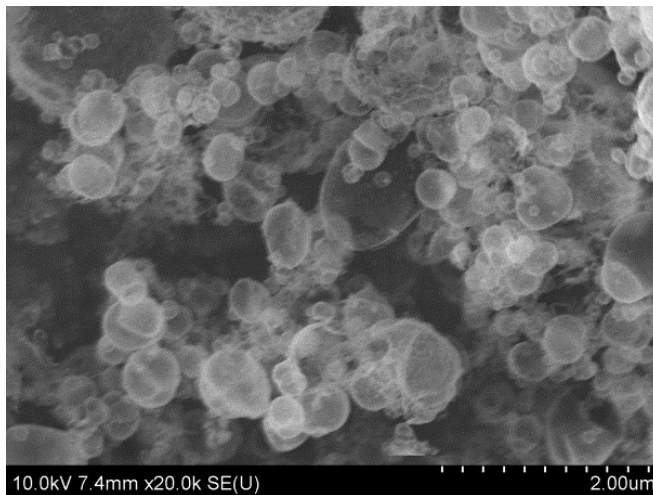

**Figure S2.** SEM image of synthesized hollow  $\text{Mn}_3\text{O}_4$  spheres.

**S3.**  $\text{N}_2$  adsorption/desorption isotherm curve and pore size distribution of hollow  $\text{Mn}_3\text{O}_4$  spheres.

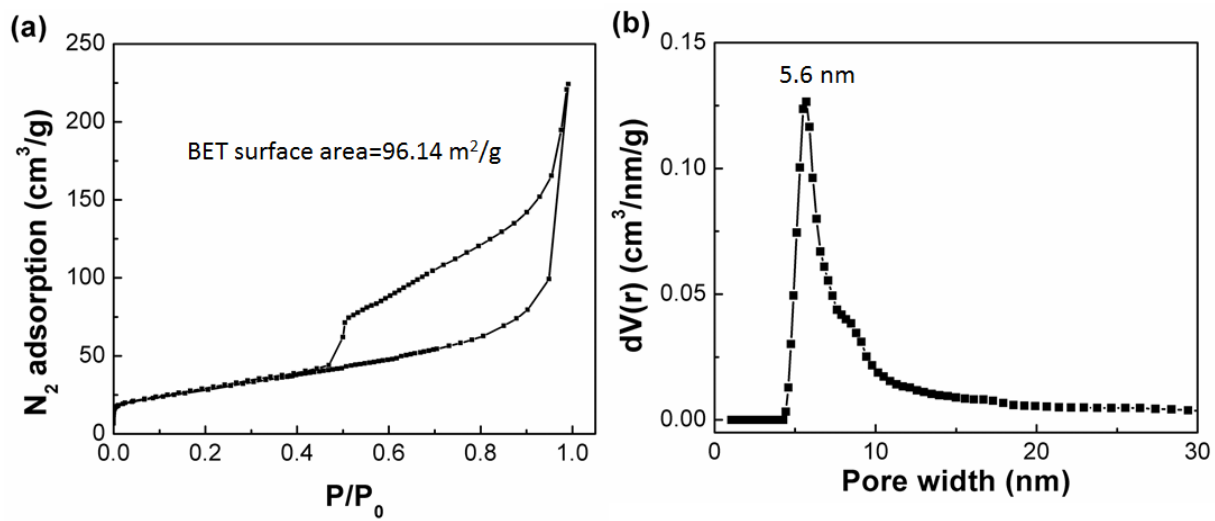

**Figure S3.** (a)  $\text{N}_2$  isothermal curves, and (b) NLDT pore size distribution curve of hollow  $\text{Mn}_3\text{O}_4$  spheres. Note: NLDT means non-local density functional theory.

**S4.** TEM images of hollow  $\text{Mn}_3\text{O}_4$  spheres after charging/discharging process.

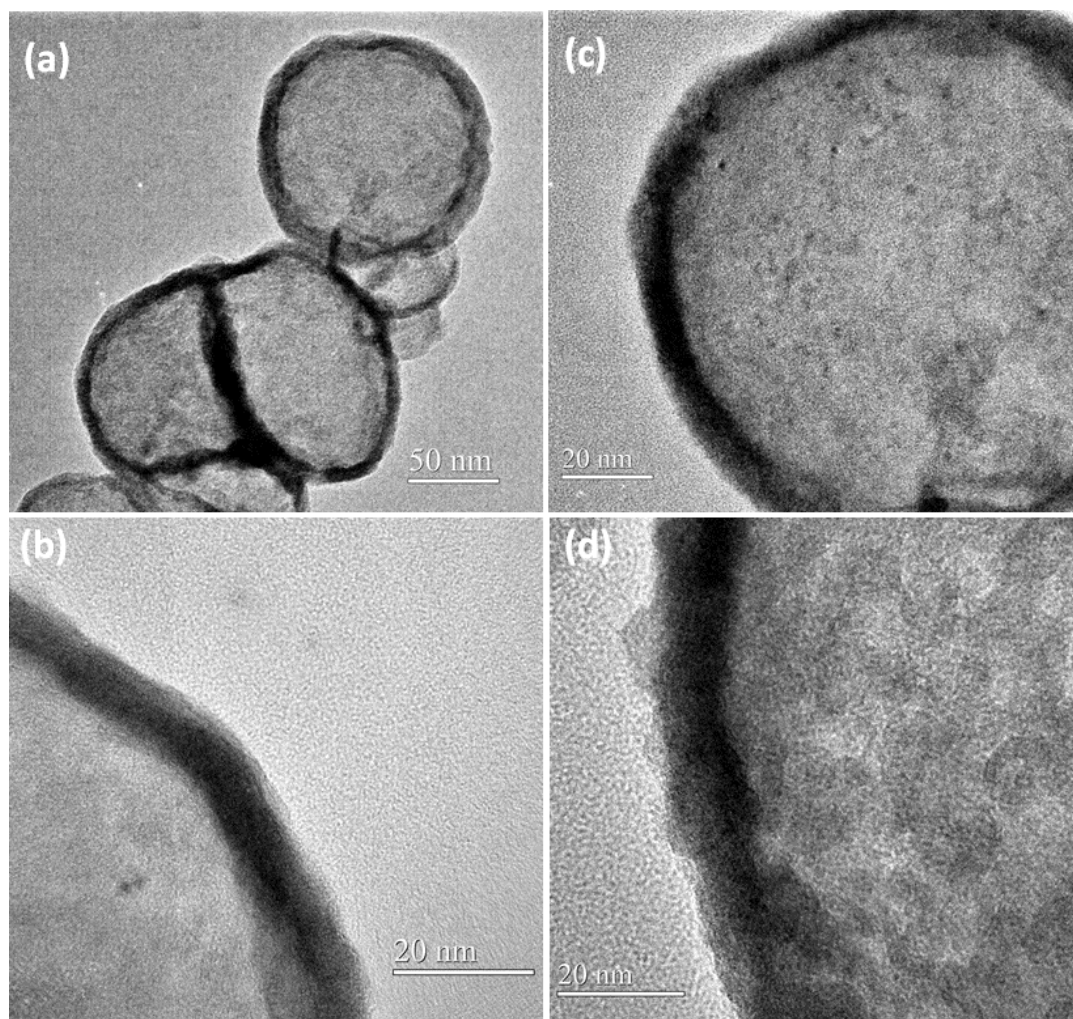

**Figure S4.** (a-d) TEM images of hollow  $\text{Mn}_3\text{O}_4$  after 140 cycles. Note: c-d are from different spheres.
